# Supplementary material for: Proteomics Reveals mRNA Regulation and the Action of Annexins in Thyroid Cancer
Source: MDPI journal article supplement (doi:10.3390/ijms241914542), 2023-09-26
Supplement: s1 [file s1]

# Proteomics reveals mRNA regulation and the action of annexins in thyroid cancer

## Supplementary material

### Tables

**Table S1.** Discrimination of the thyroid nodules of the entire studied population. Diagnosis by fine-needle aspiration biopsy (FNAB) cytology [1] and histology diagnosis [2] of all samples, including subtypes in parenthesis. Plus, discrimination of the thyroid nodules used for HR-MAS <sup>1</sup>H NMR metabolomics. Abbreviations: AUS - atypia of undetermined significance; BT – benign tumours; FTC – follicular thyroid carcinoma; PTC – papillary thyroid carcinoma.

| Individual | Sample | Cytology diagnosis            | Histology diagnosis             | HR-MAS <sup>1</sup> H NMR |
|------------|--------|-------------------------------|---------------------------------|---------------------------|
| TR008      | A      | AUS                           | BT (Follicular adenoma)         |                           |
| TR012      | A      | Benign                        | BT (Follicular nodular disease) | ✓                         |
|            | B      | Benign                        | BT (Follicular nodular disease) |                           |
| TR013      | A      | Follicular tumour             | PTC (Follicular)                | ✓                         |
| TR014      | A      | Benign                        | BT (Follicular nodular disease) |                           |
|            | B      |                               | BT (Follicular nodular disease) |                           |
|            | C      |                               | BT (Follicular nodular disease) |                           |
| TR015      | A      |                               | BT (Follicular nodular disease) |                           |
|            | B      |                               | BT (Follicular nodular disease) |                           |
| TR018      | A      | Benign                        | BT (Follicular nodular disease) | ✓                         |
| TR019      | A      | Benign                        | BT (Follicular nodular disease) |                           |
|            | B      |                               | BT (Follicular nodular disease) |                           |
| TR020      | A      | Follicular tumour (oncocytic) | FTC (Oncocytic)                 | ✓                         |
| TR021      | A      | Benign                        | BT (Follicular adenoma)         | ✓                         |
|            | B      | AUS                           | BT (Follicular nodular disease) |                           |
| TR023      | A      | Benign                        | BT (Follicular nodular disease) |                           |
| TR025      | A      |                               | BT (Follicular nodular disease) |                           |
|            | B      |                               | BT (Follicular nodular disease) |                           |
|            | C      |                               | BT (Follicular nodular disease) |                           |
| TR026      | A      | Follicular tumour             | BT (Follicular nodular disease) | ✓                         |
|            | B      | Benign                        | BT (Follicular nodular disease) |                           |
| TR028      | A      | Follicular tumour             | PTC (Follicular and solid)      | ✓                         |
| TR029      | A      | Benign                        | BT (Follicular nodular disease) |                           |
| TR030      | A      |                               | BT (Follicular nodular disease) |                           |
| TR031      | A      | Benign                        | BT (Follicular nodular disease) | ✓                         |
|            | B      | Follicular tumour             | BT (Follicular nodular disease) |                           |
| TR032      | A      | Follicular tumour             | PTC (Follicular)                | ✓                         |
| TR034      | A      | Papillary carcinoma           | PTC (Classical and follicular)  | ✓                         |
|            | B      |                               | PTC (Classical and follicular)  |                           |
| TR035      | A      | Benign                        | BT (Follicular nodular disease) |                           |
| TR037      | A      |                               | BT (Follicular nodular disease) | ✓                         |
|            | B      |                               | BT (Follicular nodular disease) |                           |
|            | C      |                               | BT (Follicular nodular disease) |                           |
|            | D      |                               | BT (Follicular nodular disease) |                           |
| TR038      | A      | Non-diagnostic                | BT (Follicular adenoma)         | ✓                         |
|            | B      |                               | BT (Follicular nodular disease) |                           |
| TR039      | A      | Benign                        | BT (Follicular nodular disease) | ✓                         |
| TR040      | A      | Benign                        | BT (Follicular nodular disease) | ✓                         |
|            | B      |                               | BT (Follicular nodular disease) |                           |
| TR041      | A      | Benign                        | BT (Follicular nodular disease) |                           |
| TR043      | A      | Benign                        | BT (Follicular nodular disease) |                           |
|            | B      |                               | BT (Follicular nodular disease) |                           |
|            | C      |                               | BT (Follicular nodular disease) |                           |
|            | D      |                               | BT (Follicular nodular disease) |                           |
| TR045      | A      | Non-diagnostic                | BT (Follicular nodular disease) |                           |

|             |    |   |                     |                                 |                                                 |
|-------------|----|---|---------------------|---------------------------------|-------------------------------------------------|
|             |    | B |                     | BT (Follicular nodular disease) |                                                 |
| TR046       |    | A | Benign              | BT (Follicular nodular disease) |                                                 |
|             |    | B | Benign              | BT (Follicular nodular disease) |                                                 |
| TR047       |    | A |                     | BT (Follicular nodular disease) | ✓                                               |
|             |    | B | Benign              | BT (Follicular nodular disease) |                                                 |
| TR048       |    | A | Benign              | BT (Follicular nodular disease) | ✓                                               |
| TR049       |    | A | Benign              | BT (Follicular nodular disease) |                                                 |
| TR050       |    | A | Papillary carcinoma | PTC (Classical and follicular)  | ✓                                               |
| TR051       |    | A | Papillary carcinoma | PTC (Classical)                 | ✓                                               |
| TR052       |    | A | Benign              | BT (Follicular nodular disease) |                                                 |
|             |    | B | Benign              | BT (Follicular nodular disease) |                                                 |
| TR053       |    | A | Papillary carcinoma | PTC (Classical)                 | ✓                                               |
| TR054       |    | A | Papillary carcinoma | PTC (Diffuse sclerosing)        | ✓                                               |
| TR055       |    | A | Papillary carcinoma | PTC (Classical)                 | ✓                                               |
| TR056       |    | A | Benign              | BT (Follicular nodular disease) | ✓                                               |
|             |    | B | Benign              | BT (Follicular nodular disease) |                                                 |
| TR057       |    | A | Non-diagnostic      | BT (Follicular nodular disease) | ✓                                               |
| TR058       |    | A | Non-diagnostic      | BT (Follicular nodular disease) |                                                 |
|             |    | B |                     | BT (Follicular nodular disease) |                                                 |
| TR059       |    | A | Benign              | BT (Follicular nodular disease) |                                                 |
| TR060       |    | A | Benign              | BT (Follicular nodular disease) |                                                 |
|             |    | B | Benign              | BT (Follicular nodular disease) |                                                 |
|             |    | C | Benign              | BT (Follicular nodular disease) |                                                 |
| TR061       |    | A | Benign              | BT (Follicular nodular disease) |                                                 |
|             |    | B | Benign              | BT (Follicular nodular disease) |                                                 |
| TR063       |    | A | Oncocytic adenoma   | BT (Oncocytic adenoma)          |                                                 |
| Individuals | 43 |   | Non-diagnostic      | 4                               | Inadequate or different from cytology 8 (15.7%) |
|             |    |   | AUS                 | 2                               |                                                 |

**Table S2.** Enriched Reactome pathways by thyroid tissue malignancy. List of top Reactome pathways ranked by p-value, with at least 20 entities total and 25% entities found. “Entities found/total” correspond to the number of proteins in the submitted list that belong to each pathway, followed by the total number of proteins for that pathway; “% entities/pathway” is the percentage of entities of this dataset found in each pathway; “p-value” is the results of PADOG method to determine gene enrichment; “FDR” is the false discovery rate of these attributions and “Regulation” informs whether this pathway is up- or down-regulated.

| Reactome pathway                                                                                                            | Entities<br>found/<br>total | %<br>entities/<br>pathway | p-value | FDR   | Regulation |
|-----------------------------------------------------------------------------------------------------------------------------|-----------------------------|---------------------------|---------|-------|------------|
| Neutrophil degranulation                                                                                                    | 234/480                     | 48.8                      | 0.001   | 0.148 | Up         |
| Glutathione conjugation                                                                                                     | 18/37                       | 48.6                      | 0.006   | 0.372 | Down       |
| Innate Immune System                                                                                                        | 376/1201                    | 31.3                      | 0.009   | 0.505 | Up         |
| RHOV GTPase cycle                                                                                                           | 11/37                       | 29.7                      | 0.009   | 0.505 | Up         |
| Post-translational protein phosphorylation                                                                                  | 46/107                      | 43.0                      | 0.01    | 0.505 | Down       |
| Metabolism of carbohydrates                                                                                                 | 101/300                     | 33.7                      | 0.011   | 0.528 | Down       |
| Interleukin-12 signaling                                                                                                    | 30/46                       | 65.2                      | 0.012   | 0.549 | Down       |
| RHO GTPases activate IQGAPs                                                                                                 | 13/32                       | 40.6                      | 0.014   | 0.56  | Up         |
| Gene and protein expression by JAK-STAT signaling after Interleukin-12 stimulation                                          | 29/37                       | 78.4                      | 0.016   | 0.591 | Down       |
| Interleukin-12 family signaling                                                                                             | 33/56                       | 58.9                      | 0.016   | 0.591 | Down       |
| Biological oxidations                                                                                                       | 56/223                      | 25.1                      | 0.016   | 0.591 | Down       |
| Phase II - Conjugation of compounds                                                                                         | 32/111                      | 28.8                      | 0.017   | 0.616 | Down       |
| Regulation of Insulin-like Growth Factor (IGF) transport and uptake by Insulin-like Growth Factor Binding Proteins (IGFBPs) | 50/124                      | 40.3                      | 0.018   | 0.64  | Down       |
| Neurodegenerative Diseases                                                                                                  | 11/22                       | 50.0                      | 0.019   | 0.64  | Up         |
| Deregulated CDK5 triggers multiple neurodegenerative pathways in Alzheimer's disease models                                 | 11/22                       | 50.0                      | 0.019   | 0.64  | Up         |
| Defective Intrinsic Pathway for Apoptosis                                                                                   | 12/25                       | 48.0                      | 0.021   | 0.66  | Up         |
| Gluconeogenesis                                                                                                             | 19/34                       | 55.9                      | 0.024   | 0.688 | Down       |
| RA biosynthesis pathway                                                                                                     | 6/22                        | 27.3                      | 0.024   | 0.688 | Down       |
| Intrinsic Pathway of Fibrin Clot Formation                                                                                  | 14/23                       | 60.9                      | 0.029   | 0.752 | Down       |
| Signaling by Interleukins                                                                                                   | 130/470                     | 27.7                      | 0.032   | 0.798 | Up         |
| Platelet degranulation                                                                                                      | 70/128                      | 54.7                      | 0.033   | 0.802 | Down       |
| Detoxification of Reactive Oxygen Species                                                                                   | 23/39                       | 59.0                      | 0.035   | 0.817 | Down       |
| Response to elevated platelet cytosolic Ca <sup>2+</sup>                                                                    | 71/133                      | 53.4                      | 0.036   | 0.817 | Down       |
| Platelet activation, signaling and aggregation                                                                              | 99/265                      | 37.4                      | 0.036   | 0.817 | Down       |
| Nuclear Envelope (NE) Reassembly                                                                                            | 34/78                       | 43.6                      | 0.043   | 0.907 | Up         |
| Nicotinate metabolism                                                                                                       | 10/31                       | 32.3                      | 0.044   | 0.918 | Up         |

|                                 |       |      |       |       |      |
|---------------------------------|-------|------|-------|-------|------|
| Adherens junctions interactions | 9/33  | 27.3 | 0.049 | 0.952 | Down |
| IRE1alpha activates chaperones  | 19/50 | 38.0 | 0.049 | 0.952 | Down |

---

**Table S3.** Biological processes altered by malignancy according to the Gorilla web application. The *P*-value corresponds to the enrichment *p*-value computed according to the minimum hypergeometric (mHG) or HG model; the FDR q value is the correction of the above *p*-value for multiple testing using the Benjamini and Hochberg method.

| <b>Biological process</b>                  | <b><i>P</i>-value</b> | <b>FDR q value</b> |
|--------------------------------------------|-----------------------|--------------------|
| nucleic acid metabolic process             | 7.27E-14              | 6.68E-10           |
| viral process                              | 3.58E-13              | 1.64E-09           |
| symbiont process                           | 3.58E-13              | 1.10E-09           |
| interspecies interaction between organisms | 8.47E-13              | 1.95E-09           |
| RNA metabolic process                      | 9.04E-12              | 1.66E-08           |
| macromolecule localization                 | 1.73E-10              | 2.65E-07           |
| multi-organism process                     | 1.88E-10              | 2.46E-07           |
| establishment of protein localization      | 3.73E-10              | 4.29E-07           |
| nitrogen compound transport                | 5.03E-10              | 5.14E-07           |
| ncRNA metabolic process                    | 5.64E-10              | 5.18E-07           |
| mRNA metabolic process                     | 5.72E-10              | 4.78E-07           |

**Table S4.** Enriched KEGG pathways by thyroid tissue malignancy. Ranked list of KEGG pathways according to DAVID. Count corresponds to the number of proteins in the submitted list that belong to each pathway; “%” is the percentage of proteins in each pathway relative to the total of imported proteins; p-value is the result of Fisher's Exact test to determine gene enrichment; and FDR is the false discovery rate of these attributions.

| KEGG pathway                                      | Count | %<br>entities/<br>pathway | p-value | FDR    |
|---------------------------------------------------|-------|---------------------------|---------|--------|
| Ribosome                                          | 71    | 4.3                       | <0.001  | <0.001 |
| Spliceosome                                       | 63    | 3.8                       | <0.001  | <0.001 |
| Proteasome                                        | 29    | 1.8                       | <0.001  | <0.001 |
| Coronavirus disease - COVID-19                    | 73    | 4.4                       | <0.001  | <0.001 |
| Prion disease                                     | 80    | 4.9                       | <0.001  | <0.001 |
| Carbon metabolism                                 | 46    | 2.8                       | <0.001  | <0.001 |
| Amyotrophic lateral sclerosis                     | 96    | 5.8                       | <0.001  | <0.001 |
| Huntington disease                                | 84    | 5.1                       | <0.001  | <0.001 |
| Nucleocytoplasmic transport                       | 41    | 2.5                       | <0.001  | <0.001 |
| Citrate cycle (TCA cycle)                         | 20    | 1.2                       | <0.001  | <0.001 |
| Parkinson disease                                 | 73    | 4.4                       | <0.001  | <0.001 |
| Salmonella infection                              | 65    | 4                         | <0.001  | <0.001 |
| Protein processing in endoplasmic reticulum       | 49    | 3                         | <0.001  | <0.001 |
| Valine, leucine and isoleucine degradation        | 21    | 1.3                       | <0.001  | <0.001 |
| Diabetic cardiomyopathy                           | 52    | 3.2                       | <0.001  | <0.001 |
| Pathways of neurodegeneration - multiple diseases | 97    | 5.9                       | <0.001  | <0.001 |
| Phagosome                                         | 42    | 2.6                       | <0.001  | <0.001 |
| Alzheimer disease                                 | 82    | 5                         | <0.001  | <0.001 |
| Endocytosis                                       | 58    | 3.5                       | <0.001  | <0.001 |
| Systemic lupus erythematosus                      | 37    | 2.3                       | <0.001  | <0.001 |
| Pathogenic Escherichia coli infection             | 48    | 2.9                       | <0.001  | <0.001 |
| Aminoacyl-tRNA biosynthesis                       | 23    | 1.4                       | <0.001  | <0.001 |
| Regulation of actin cytoskeleton                  | 53    | 3.2                       | <0.001  | <0.001 |
| Fatty acid metabolism                             | 20    | 1.2                       | <0.001  | <0.001 |
| Oxidative phosphorylation                         | 35    | 2.1                       | <0.001  | <0.001 |
| mRNA surveillance pathway                         | 28    | 1.7                       | <0.001  | <0.001 |
| Bacterial invasion of epithelial cells            | 24    | 1.5                       | <0.001  | 0.001  |
| Chemical carcinogenesis - reactive oxygen species | 50    | 3                         | <0.001  | 0.001  |
| Focal adhesion                                    | 46    | 2.8                       | <0.001  | 0.001  |
| Shigellosis                                       | 53    | 3.2                       | <0.001  | 0.001  |
| Fatty acid degradation                            | 16    | 1                         | <0.001  | 0.001  |
| Spinocerebellar ataxia                            | 35    | 2.1                       | <0.001  | 0.002  |
| Lysosome                                          | 32    | 1.9                       | <0.001  | 0.003  |
| Pyruvate metabolism                               | 16    | 1                         | <0.001  | 0.004  |
| RNA degradation                                   | 22    | 1.3                       | 0.001   | 0.005  |
| Biosynthesis of amino acids                       | 21    | 1.3                       | 0.001   | 0.006  |
| Viral carcinogenesis                              | 43    | 2.6                       | 0.001   | 0.007  |
| Viral myocarditis                                 | 18    | 1.1                       | 0.001   | 0.007  |
| Protein export                                    | 10    | 0.6                       | 0.001   | 0.009  |
| Propanoate metabolism                             | 12    | 0.7                       | 0.001   | 0.009  |
| Metabolic pathways                                | 232   | 14.1                      | 0.002   | 0.011  |
| Fc gamma R-mediated phagocytosis                  | 24    | 1.5                       | 0.002   | 0.013  |

|                                                            |    |     |       |       |
|------------------------------------------------------------|----|-----|-------|-------|
| ECM-receptor interaction                                   | 22 | 1.3 | 0.003 | 0.017 |
| Tuberculosis                                               | 37 | 2.3 | 0.003 | 0.021 |
| Glutathione metabolism                                     | 16 | 1   | 0.004 | 0.024 |
| Viral life cycle - HIV-1                                   | 17 | 1   | 0.004 | 0.026 |
| Complement and coagulation cascades                        | 21 | 1.3 | 0.005 | 0.027 |
| Sulfur metabolism                                          | 6  | 0.4 | 0.005 | 0.027 |
| Adherens junction                                          | 18 | 1.1 | 0.006 | 0.036 |
| 2-Oxocarboxylic acid metabolism                            | 8  | 0.5 | 0.007 | 0.036 |
| Antigen processing and presentation                        | 19 | 1.2 | 0.008 | 0.041 |
| Neutrophil extracellular trap formation                    | 37 | 2.3 | 0.008 | 0.043 |
| Glycolysis / Gluconeogenesis                               | 17 | 1   | 0.008 | 0.043 |
| Glyoxylate and dicarboxylate metabolism                    | 10 | 0.6 | 0.010 | 0.050 |
| Tight junction                                             | 33 | 2   | 0.012 | 0.061 |
| Pertussis                                                  | 18 | 1.1 | 0.013 | 0.063 |
| Non-homologous end-joining                                 | 6  | 0.4 | 0.017 | 0.084 |
| Nucleotide metabolism                                      | 19 | 1.2 | 0.018 | 0.088 |
| Epstein-Barr virus infection                               | 37 | 2.3 | 0.020 | 0.096 |
| Legionellosis                                              | 14 | 0.9 | 0.024 | 0.110 |
| Leukocyte transendothelial migration                       | 23 | 1.4 | 0.028 | 0.130 |
| Influenza A                                                | 31 | 1.9 | 0.039 | 0.170 |
| Type I diabetes mellitus                                   | 11 | 0.7 | 0.039 | 0.170 |
| Drug metabolism - other enzymes                            | 17 | 1   | 0.041 | 0.180 |
| Arginine and proline metabolism                            | 12 | 0.7 | 0.045 | 0.190 |
| Fatty acid elongation                                      | 8  | 0.5 | 0.047 | 0.190 |
| Fructose and mannose metabolism                            | 9  | 0.5 | 0.050 | 0.200 |
| Proteoglycans in cancer                                    | 35 | 2.1 | 0.059 | 0.240 |
| Proximal tubule bicarbonate reclamation                    | 7  | 0.4 | 0.062 | 0.250 |
| Necroptosis                                                | 28 | 1.7 | 0.067 | 0.260 |
| Other glycan degradation                                   | 6  | 0.4 | 0.068 | 0.260 |
| Fatty acid biosynthesis                                    | 6  | 0.4 | 0.068 | 0.260 |
| Tryptophan metabolism                                      | 10 | 0.6 | 0.077 | 0.290 |
| Nicotinate and nicotinamide metabolism                     | 9  | 0.5 | 0.077 | 0.290 |
| Thermogenesis                                              | 38 | 2.3 | 0.081 | 0.300 |
| Amino sugar and nucleotide sugar metabolism                | 11 | 0.7 | 0.084 | 0.310 |
| Human immunodeficiency virus 1 infection                   | 35 | 2.1 | 0.086 | 0.310 |
| beta-Alanine metabolism                                    | 8  | 0.5 | 0.089 | 0.310 |
| Asthma                                                     | 8  | 0.5 | 0.089 | 0.310 |
| Apoptosis                                                  | 24 | 1.5 | 0.089 | 0.310 |
| Peroxisome                                                 | 16 | 1   | 0.090 | 0.310 |
| HIF-1 signaling pathway                                    | 20 | 1.2 | 0.091 | 0.310 |
| Vibrio cholerae infection                                  | 11 | 0.7 | 0.094 | 0.310 |
| Epithelial cell signaling in Helicobacter pylori infection | 14 | 0.9 | 0.099 | 0.320 |
| Platelet activation                                        | 22 | 1.3 | 0.100 | 0.320 |
| Allograft rejection                                        | 9  | 0.5 | 0.100 | 0.320 |

**Table S5.** Proteins with AUC>0.95 for univariate ROC analysis. Mean values are derived from relative abundance quantifications. SEM – Standard error of the mean, AUC – Area under the ROC curve

| Protein      | Benign<br>mean $\pm$ SEM | Malignant<br>mean $\pm$ SEM | Log2<br>median<br>fold<br>change | Mann-<br>Whitney<br>p-value | AUC  |
|--------------|--------------------------|-----------------------------|----------------------------------|-----------------------------|------|
| P04083 ANXA1 | 0.000917 $\pm$ 0.000075  | 0.007239 $\pm$ 0.001537     | 2.44                             | < 0.0001                    | 0.99 |
| P08727 K1C19 | 0.000213 $\pm$ 0.000058  | 0.003353 $\pm$ 0.000954     | 4.24                             | < 0.0001                    | 0.98 |
| P50995 ANX11 | 0.000255 $\pm$ 0.000015  | 0.000693 $\pm$ 0.000064     | 1.58                             | < 0.0001                    | 0.98 |
| Q9UKK3 PARP4 | 0.000006 $\pm$ 0.000001  | 0.00003 $\pm$ 0.000004      | 2.25                             | < 0.0001                    | 0.98 |
| Q9UPN3 MACF1 | 0.000045 $\pm$ 0.000002  | 0.000101 $\pm$ 0.000009     | 1.28                             | < 0.0001                    | 0.97 |
| Q9NZM1 MYOF  | 0.000123 $\pm$ 0.000007  | 0.000348 $\pm$ 0.000042     | 1.44                             | < 0.0001                    | 0.97 |
| Q15149 PLEC  | 0.000461 $\pm$ 0.000035  | 0.001403 $\pm$ 0.000149     | 1.70                             | < 0.0001                    | 0.97 |
| Q99536 VAT1  | 0.000435 $\pm$ 0.000022  | 0.000894 $\pm$ 0.000057     | 1.09                             | < 0.0001                    | 0.97 |
| P06753 TPM3  | 0.000063 $\pm$ 0.000004  | 0.000248 $\pm$ 0.000036     | 1.70                             | < 0.0001                    | 0.97 |
| P02763 A1AG1 | 0.000235 $\pm$ 0.00003   | 0.000023 $\pm$ 0.000004     | -3.02                            | < 0.0001                    | 0.97 |
| Q9BUF5 TBB6  | 0.000079 $\pm$ 0.000004  | 0.000216 $\pm$ 0.000028     | 1.35                             | < 0.0001                    | 0.97 |
| Q6UX53 MET7B | 0.000005 $\pm$ 0.000001  | 0.000119 $\pm$ 0.000049     | 4.21                             | < 0.0001                    | 0.97 |
| O60831 PRAF2 | 0.000021 $\pm$ 0.000001  | 0.000054 $\pm$ 0.000005     | 1.41                             | < 0.0001                    | 0.97 |
| Q14195 DPYL3 | 0.000194 $\pm$ 0.000015  | 0.000864 $\pm$ 0.00016      | 2.17                             | < 0.0001                    | 0.97 |
| Q9BSJ8 ESYT1 | 0.000169 $\pm$ 0.000012  | 0.000426 $\pm$ 0.00004      | 1.36                             | < 0.0001                    | 0.96 |
| Q9BTV4 TMM43 | 0.000069 $\pm$ 0.000007  | 0.00024 $\pm$ 0.000026      | 1.95                             | < 0.0001                    | 0.96 |
| P46821 MAP1B | 0.000028 $\pm$ 0.000003  | 0.000096 $\pm$ 0.000012     | 2.09                             | < 0.0001                    | 0.96 |
| P02545 LMNA  | 0.002557 $\pm$ 0.000144  | 0.00588 $\pm$ 0.000561      | 1.28                             | < 0.0001                    | 0.96 |
| Q9Y646 CBPQ  | 0.007057 $\pm$ 0.000618  | 0.001622 $\pm$ 0.000386     | -2.84                            | < 0.0001                    | 0.96 |
| Q9P2R3 ANFY1 | 0.000009 $\pm$ 0.000001  | 0.000018 $\pm$ 0.000002     | 0.92                             | < 0.0001                    | 0.96 |
| Q13509 TBB3  | 0.000006 $\pm$ 0         | 0.000044 $\pm$ 0.000008     | 2.98                             | < 0.0001                    | 0.96 |
| Q93099 HGD   | 0.000047 $\pm$ 0.000004  | 0.00001 $\pm$ 0.000002      | -1.96                            | < 0.0001                    | 0.96 |
| Q5JTH9 RRP12 | 0.000002 $\pm$ 0.000001  | 0.000014 $\pm$ 0.000002     | 6.03                             | < 0.0001                    | 0.96 |
| Q13228 SBP1  | 0.00461 $\pm$ 0.000275   | 0.001351 $\pm$ 0.000214     | -1.81                            | < 0.0001                    | 0.95 |
| P60903 S10AA | 0.000026 $\pm$ 0.000004  | 0.000206 $\pm$ 0.00004      | 3.77                             | < 0.0001                    | 0.95 |
| Q13636 RAB31 | 0.00002 $\pm$ 0.000001   | 0.000054 $\pm$ 0.000005     | 1.56                             | < 0.0001                    | 0.95 |
| P25685 DNJB1 | 0.000042 $\pm$ 0.000002  | 0.000092 $\pm$ 0.00001      | 1.05                             | < 0.0001                    | 0.95 |
| Q14764 MVP   | 0.000152 $\pm$ 0.000012  | 0.000761 $\pm$ 0.000127     | 2.62                             | < 0.0001                    | 0.95 |
| Q08J23 NSUN2 | 0.000021 $\pm$ 0.000001  | 0.000048 $\pm$ 0.000005     | 1.15                             | < 0.0001                    | 0.95 |
| P62847 RS24  | 0.000026 $\pm$ 0.000002  | 0.0001 $\pm$ 0.000011       | 2.31                             | < 0.0001                    | 0.95 |
| P43307 SSRA  | 0.000135 $\pm$ 0.000008  | 0.00037 $\pm$ 0.000047      | 1.48                             | < 0.0001                    | 0.95 |
| Q9BQG0 MBB1A | 0.000016 $\pm$ 0.000002  | 0.00005 $\pm$ 0.000005      | 2.12                             | < 0.0001                    | 0.95 |
| P05198 IF2A  | 0.000082 $\pm$ 0.000003  | 0.000143 $\pm$ 0.000009     | 0.83                             | < 0.0001                    | 0.95 |



## Figures

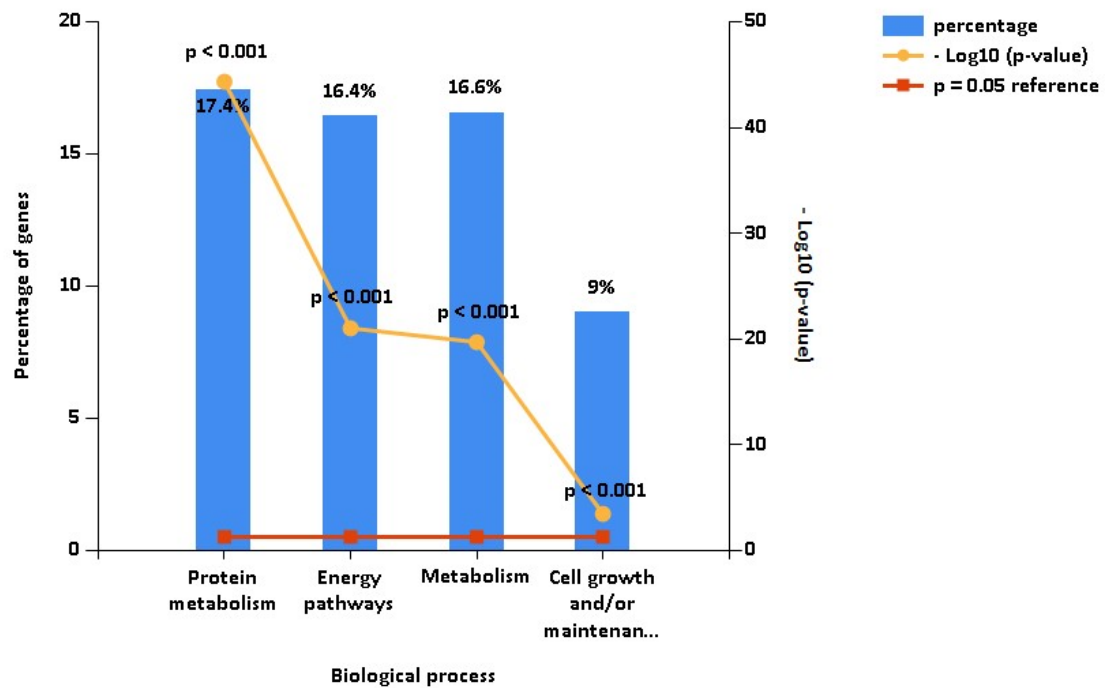

**Figure S1. Protein metabolism, energy pathways, intermediary metabolism, and cell growth and/or maintenance are altered in malignant thyroid lesions.** Selection of biological processes altered by malignancy with a  $p < 0.05$  for the enrichment performed with a hypergeometric test (HG).

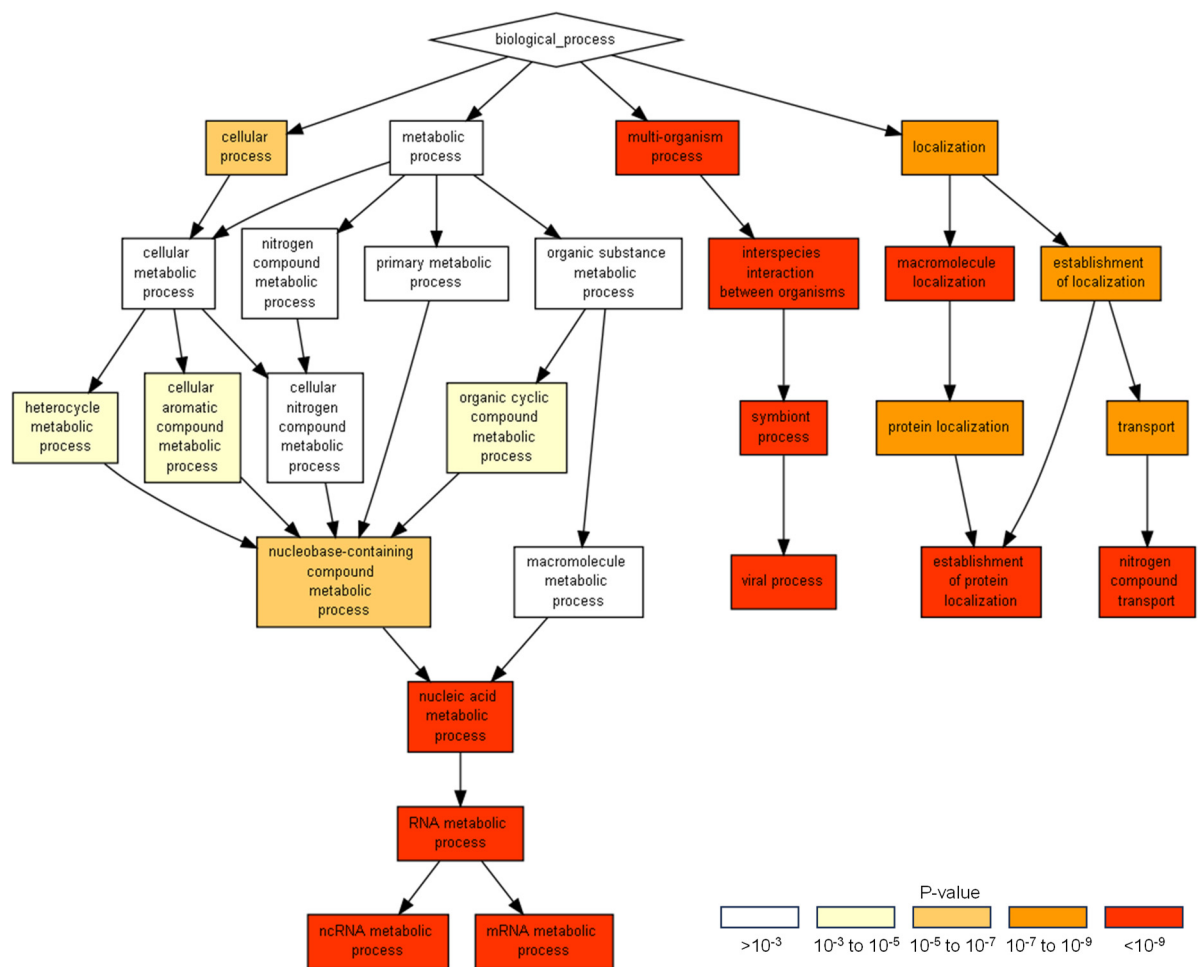

**Figure S2. RNA regulation and viral processes are altered in malignant thyroid lesions.** Representation of the biological processes altered by malignancy. Only biological processes branches with a  $p < 10^{-8}$  are represented. Colour coding reflects the degree of enrichment, with darker red colours representing  $p < 10^{-9}$ .

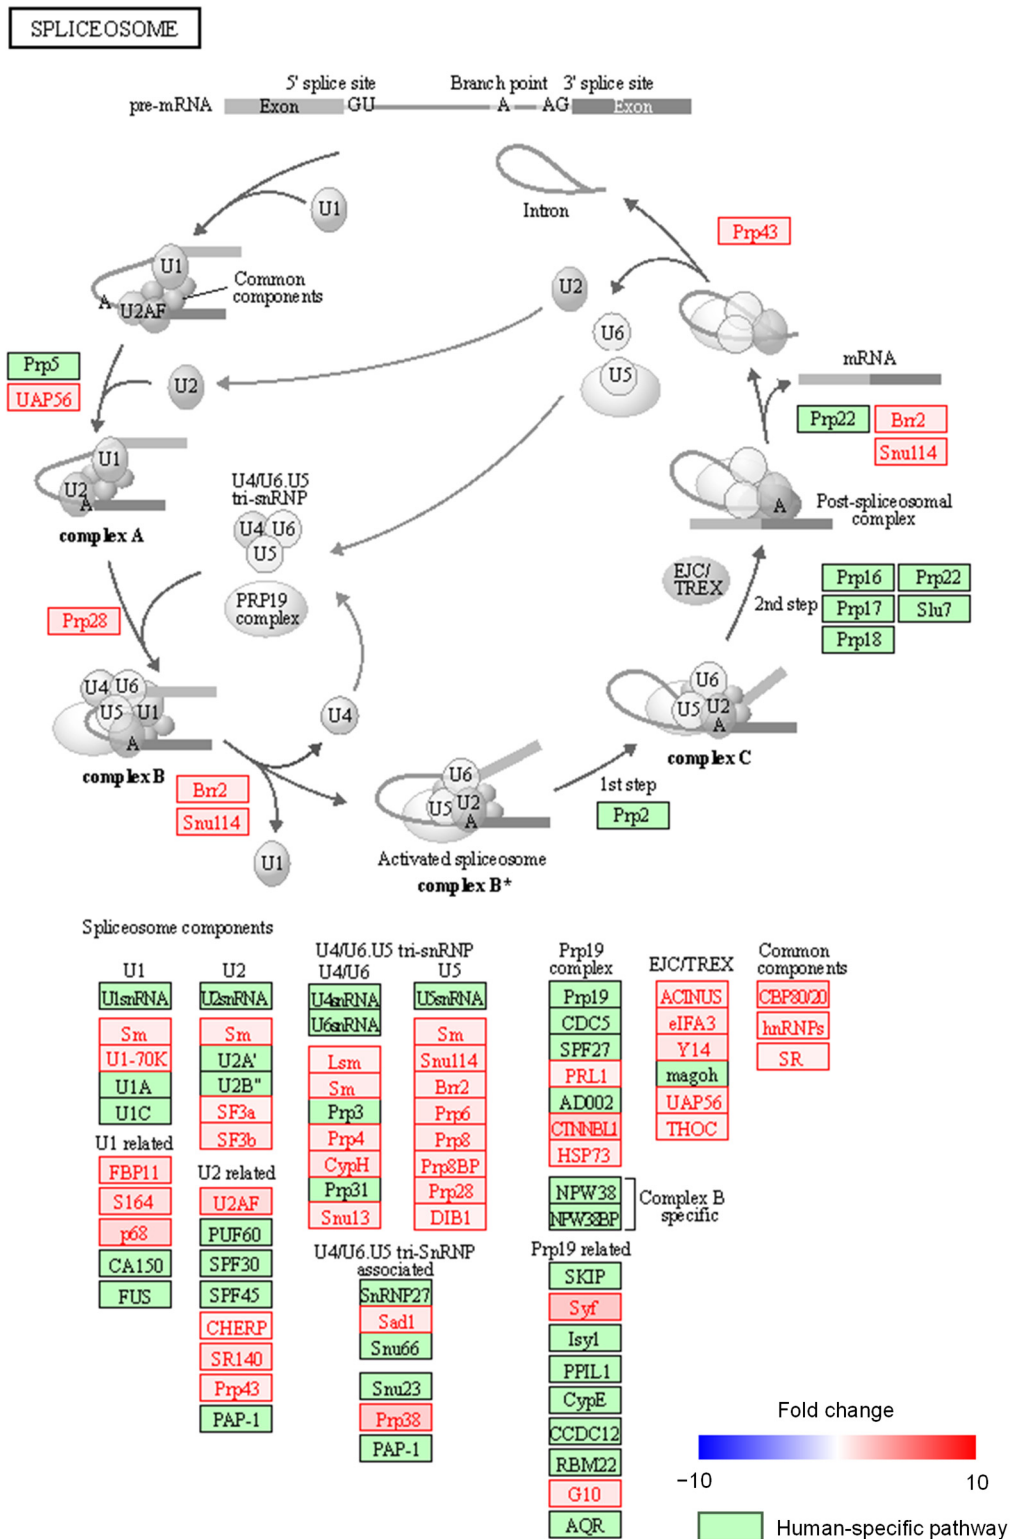

**Figure S3. KEGG spliceosome pathway with annotation of statistically altered proteins in malignant thyroid lesions.** Upper panel represents main splicing steps and lower panel represents other spliceosome components. Proteins quantified in this study are labelled as red if they are increased in the malignancy group and blue if they are decreased, with this colour code gradient depending on fold change value. Other proteins from human-specific pathways but not quantified in this study are depicted in green.

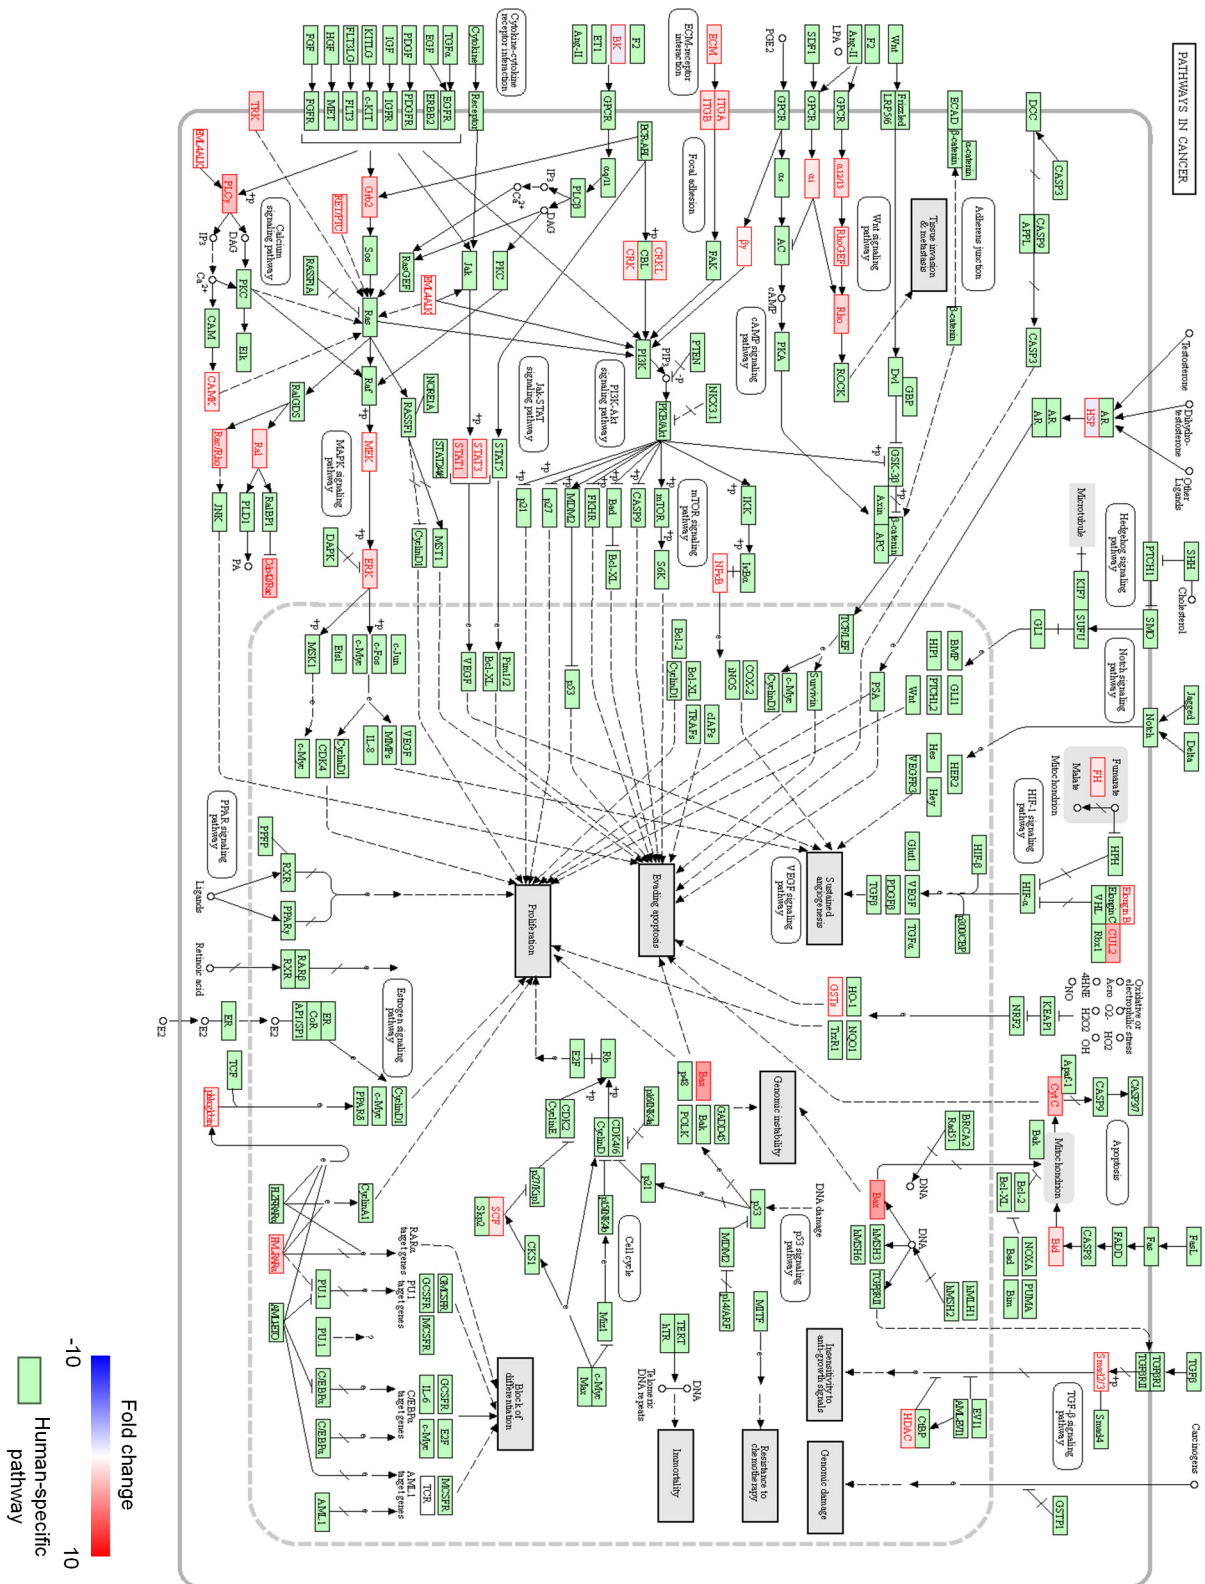

**Figure S4. KEGG pathways in cancer with annotation of statistically altered proteins in malignant thyroid lesions.** Proteins quantified in this study are labelled as red if they are increased in the malignancy group and blue if they are decreased, with this colour code gradient depending on fold change value. Other proteins from human-specific pathways but not quantified in this study are depicted in green.

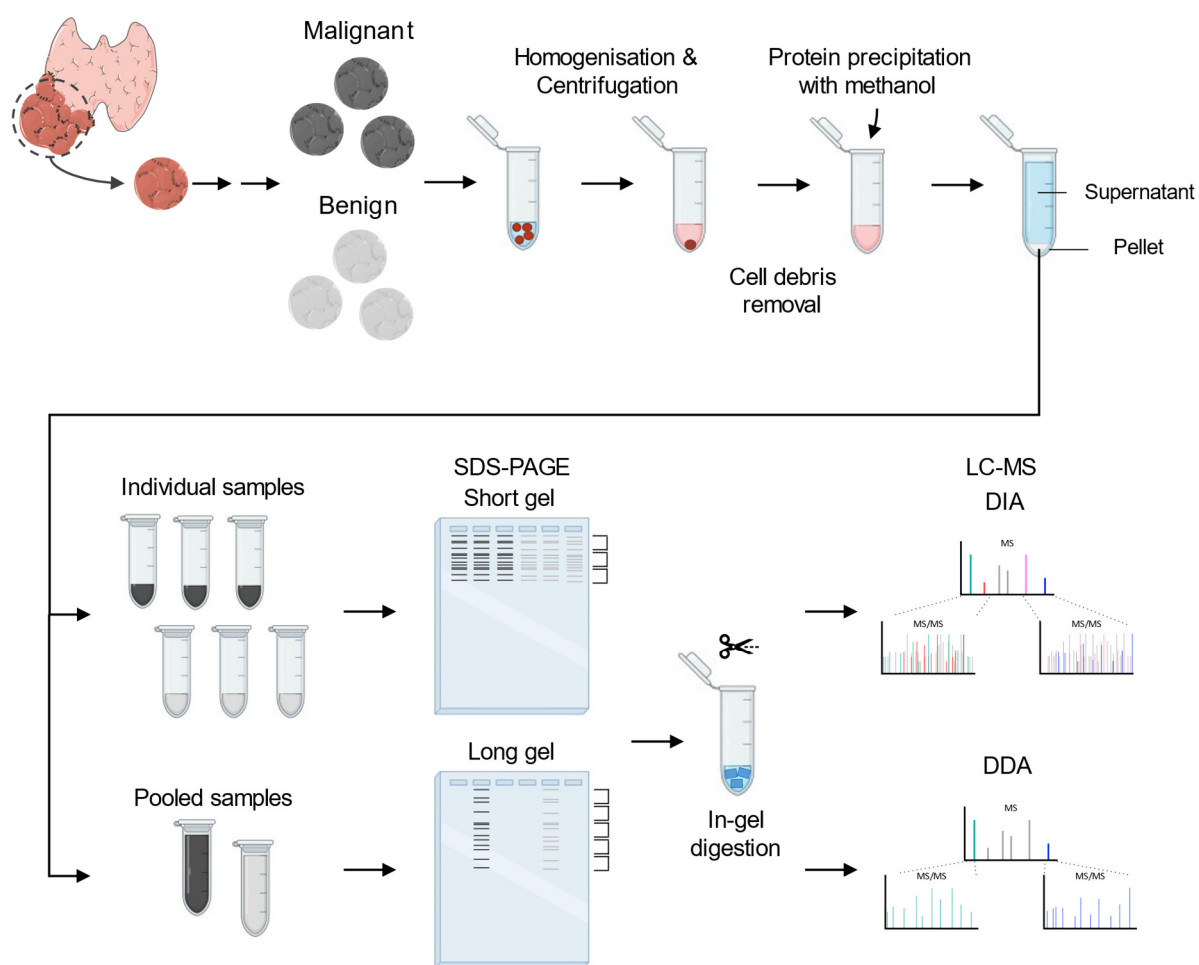

**Figure S5. Workflow of thyroid tissues sample preparation for LC-MS proteomics.** Malignant samples are represented in black, while benign samples are represented in grey.

## References

1. Ali, S.Z.; Baloch, Z.W.; Cochand-Priollet, B.; Schmitt, F.C.; Vielh, P.; VanderLaan, P.A. The 2023 Bethesda System for Reporting Thyroid Cytopathology. *Thyroid* **2023**, *27*, 1341–1346. <https://doi.org/10.1089/thy.2023.0141>.
2. Lloyd, R.; Osamura, R.; Rosai, J. WHO Classification of Tumours Editorial Board. In *Endocrine and Neuroendocrine Tumours*; IARC: Lyon, France, 2022.
